# Supplementary material for: Efficiency of Electronic Health Record Assessment of Patient-Reported Outcomes After Cancer Immunotherapy: A Randomized Clinical Trial
Source: PubMed Central journal article supplement (PMC8972037; doi:10.1001/jamanetworkopen.2022.4427), 2022-03-31
Supplement: jamanetwopen-e224427-s001.pdf [file jamanetwopen-e224427-s001.pdf]

1 **Efficiency of an Electronic Follow-up Model for Assessing**  
2 **Patient-Reported Outcomes after Cancer Immunotherapy: A Randomized**  
3 **Controlled Trial (Protocol)**

4

5 **Background**

6 The oncology treatment landscape has been changed by immunotherapy,  
7 represented by immune checkpoint inhibitors ( ICIs ) . Monoclonal antibody  
8 therapy is mainly directed against cytotoxic T lymphocyte-associated antigen 4,  
9 CTLA4 ) programmed death-1 receptor ( pd1 ) and its ligand1 (pdl1). The FDA  
10 has approved it to treat a variety of solid cancers and Hodgkin's lymphoma. A  
11 growing number of oncology patients may benefit from this, but at the same  
12 time, patients may experience immune-related adverse events ( irAEs ) . irAEs  
13 are non-specific responses produced by the immune system, affecting almost  
14 all tissues and organs. The most frequently involved sites are the skin, colon,  
15 endocrine system, liver, and lung, while there are few irAEs in the heart, liver,  
16 kidney, nerves, and eyes. Studies have shown that 90% of patients treated  
17 with single-agent ICI will experience varying degrees of irAEs, primarily mild to  
18 moderate. However, up to 43% of these patients apply ipilimumab, and about  
19 20% of patients receiving PD1/PDL1 therapy will experience grade 3 or higher  
20 irAEs, such as severe enterocolitis, pneumonia, and myocarditis. Failure to  
21 identify and treat patients promptly can result in interruption of treatment in  
22 about 20% of patients and associated death in about 2% of patients.

23 Unlike chemotherapy-induced toxicity, irAEs are delayed reactions that  
24 typically occur months after administration or even withdrawal and last longer.  
25 The risk of irAEs is compounded by the fact that irAEs can be easily confused  
26 with other disease symptoms or overlooked, leading to delays in treatment.  
27 Medical staffs and patients should be vigilant for early identification of irAEs  
28 and timely intervention to ensure patient safety. The current strain on health  
29 care resources, the vast majority of time patients spend outside the hospital,

30 and the lack of supervision by health care workers further increase the risk of  
31 post-medication use. Effective and long-term out-of-hospital management of  
32 patients can play an essential role in the early detection and recognition of  
33 irAEs. If intervening on time can ensure the safety and efficacy of patients  
34 applying immunotherapy.

35 Foreign studies have shown that oncology patients with PRO follow-up  
36 systems can have a better prognosis than patients with regular outpatient  
37 follow-up, as evidenced by lower emergency department visits, a better quality  
38 of life, and more prolonged survival.

39 This system can be applied to monitor the status of mobile clients to detect  
40 serious treatment side effects at any time, to remind patients to go to the  
41 hospital on time. It can also provide doctors with the patient's indescribable  
42 discomfort symptoms during follow-up visits, improving the efficiency of the  
43 outpatient approach. Such systems can be safer for patients and reduce the  
44 occurrence of severe adverse reactions while also reducing the workload of  
45 health care workers. Given the emerging therapeutic approach of  
46 immunotherapy and the specificity of irAEs, exploring effective patient  
47 management to improve patient safety should be a priority for medical  
48 professionals; however, there is a lack of research findings in this area.

49

## 50 **Objectives**

51 A randomized controlled trail was designed to compare the outcomes  
52 between Patient-Reported Outcomes(PRO) and traditional follow up models in  
53 Cancer Immunotherapy. To explore the effects of ePROs mode on improving  
54 the safety including reducing the incidence of severe adverse reactions,  
55 unexpected emergency visits(ER), discontinue of treatment or death,  
56 improving quality of life and saving time of patients.

57

## 58 **Methods**

59 This study was an open label, multicenter randomized control trial comparing

60 the follow up outcomes among intervention group and control group among  
61 patients who treated with cancer immunotherapy . Randomization occurred  
62 immediately after a participant provided informed consent at each center.  
63 Participants were randomly assigned to the control group or intervention  
64 groups by computer system.

65

## 66 **Patients**

67 Enrollment started in September 2019, the study ended when the last patients  
68 were follow up by 6 month. Eligible individuals for the study were those who:1)  
69 were receiving cancer immunotherapy, 2) were aged  $\geq 18$  years, 3)Eastern  
70 cooperative oncology group (ECOG) performance status was 0 or 1, 4)life  
71 expectancy was at least 6 months,5) were also willing to complete the  
72 follow-up process according to the protocol, 6) could use smartphones or  
73 computers to include information in the App with or without the help of their  
74 caregivers were included in the study. Exclusion criteria: 1) diagnosed mental  
75 disease, 2)psychiatric symptoms that interfered with daily life and  
76 communication, 3) refused to participate in the study.

77

## 78 **Sample size**

79 Pass software was used to calculate the sample size. It was assumed that the  
80 incidence of severe adverse reactions in the test group was 10% lower than  
81 that in the control group. The unilateral Z test was applied;  $\alpha = 0.05$ ,  $\beta = 0.1$ . The  
82 results showed that there were 96 patients in each group; the data for 10%  
83 were determined to be lost during the follow-up process. The final sample size  
84 of each group was determined to include at least 103 cases considering the  
85 loss to follow up, the total sample size included 300 cases.,

86

## 87 **Intervention**

88 **Follow up Team** The ePRO App will be built and maintained by computer  
89 specialists from the Aistarfish Technology Co.,Ltd. A follow-up team that

90 included 1 oncology specialist and 2 nurses was conclude in every center.  
91 Every center will have a unique account of APP and the team were responsible  
92 for follow-up to their own patients. All researchers had at least 2 years of  
93 experience in ICIs therapy and received a training about research program,  
94 APP using and follow up process before study initial.

95

### 96 **Control group**

97 Researchers educated patients and their caregivers about immunotherapy and  
98 common symptoms of irAEs at the baseline. Patients was followed up by  
99 nurses as traditional model which including clinic visits every 21 days and via  
100 the telephone every 3 months. Patients can come to clinic when feel  
101 discomfort.

102

### 103 **Intervention group**

104 Patients in intervention group were assisted registered and followed up via the  
105 ePRO follow-up APP. The APP which contain questionnaire of common  
106 symptoms and image recognizen function of examination results to evaluating  
107 the occurrence and grades of typical irAEs according to the guidelines.

108 Patients complete questionnaire weekly and upload pictures of examination  
109 results between visits on their mobile or computer. The APP will sent a  
110 reminder message to patients who did not reply for two days delay. If there  
111 was still no reply, telephonic follow-up will be conducted.

112 The APP also had an algorithm for assessing severity of symptom or  
113 examining results according to NCI-CTCAE <sup>[18-21]</sup>.When the grade 1/2 irAEs  
114 occurrence, the standardized advices were sent to relative patients by App  
115 automatically. If 3/4 irAEs were reported, the APP will alert health cares by  
116 sending alarms via text message, email, and APP at once. The health cares  
117 would immediately follow up via telephone and comprehensively evaluate the  
118 patient's situation. If serious AEs were still suspected, patients would be  
119 adviced to go to the emergency department, and evaluate and treat the patient

120 as soon as possible(See [figure1](#)).

121

## 122 **Measures**

### 123 **Demographic characteristics and clinical conditions**

124 Demographic information, including the age, sex, educational background, and  
125 marital status of patients, was recorded. Information regarding clinical  
126 conditions, including the primary cancer type, treatment, number of ER visits,  
127 and survival status, was also collected.

128

129

### 130 **Relative indexes of IrAEs**

131 Data regarding irAE incidence and grades, the rate of occurrence of grade 3/4  
132 irAEs (cases/ total cases), and rate of treatment discontinuation and death  
133 owing to irAEs were collected.

134

### 135 **Quality of Life**

136 Quality of Life c-30 (QLQ c-30) was used to measure the QOL of subjects  
137 every 3 months. This tool, designed by Aaronson *et al.* <sup>[22]</sup>, evaluates the ability  
138 of patients to adapt to life. It was translated into Chinese by Chonghua *et al.* <sup>[23]</sup>,  
139 and the Chinese version was determined to be reliable. QLQ c-30 was  
140 comprised of 30 items, including 5 function dimensions (physical, role,  
141 emotional, perception, and social functions), 9 symptom dimensions (fatigue,  
142 nausea and vomiting, pain, shortness of breath, insomnia, loss of appetite,  
143 astriction, diarrhea, and economic difficulty), and 1 health situation. Two of the  
144 health situation items were assigned scores between 1 to 7, while the others  
145 were evaluated using the Likert 4 grade score. Based on the rules for  
146 assigning scores, we transformed every dimensional score to a standard score  
147 ranging from 0-100. The functional dimension score and the health situation  
148 score were positively correlated with patient QOL, while a high symptom  
149 dimension score was correlated with a severe manifestation.

150

151 **Average time consuming**

152 Researcher record the time consuming of each follow up. Average time  
153 consuming ( total time /number of follow up per patient) of each follow up were  
154 compared between two groups.

155

156 **Research route**

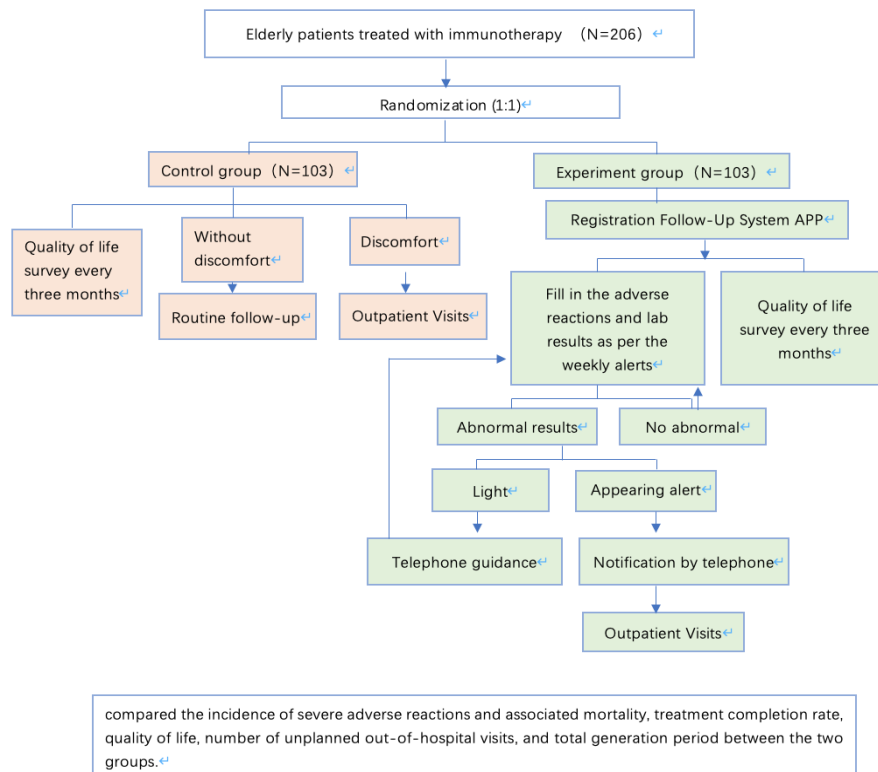

157

158

159

160 **Expected solutions for critical problems and difficulties**

161 Compared with the traditional follow-up model, whether the management  
162 model of the PRO follow-up system can reduce the incidence of severe irAEs  
163 and associated mortality after medication in immunotherapy patients. The  
164 application of the PRO follow-up system can improve patient safety by  
165 reducing the incidence of severe adverse reactions and associated mortality,  
166 the number of ER visits, treatment discontinue rate, quality of life, and overall

167 survival and time consuming in immunotherapy patients compared to the  
168 traditional follow-up model.

169 The difficulty of the study is how to improve the response rate of patients to  
170 the follow-up system. The solutions including firstly, the purpose and  
171 significance of the study are fully explained before the patients are enrolled to  
172 obtain their cooperation. Second, the system will send task reminders to the  
173 platform again for patients who do not answer after the timeout. If they still do  
174 not answer, there will be a telephone follow-up to ensure the integrity of the  
175 follow-up information.

176

### 177 **Feasibility analysis**

178 1) Theoretically feasible : This research on this topic is based on previous  
179 studies. The project is based on a sufficient basis, and the preliminary results  
180 are persuasive.

181 (2) Technically feasible: The group members include senior oncologists and  
182 nurses, and as the leader of the group, we have undertaken several related  
183 scientific research projects and treated nearly 1,000 patients receiving  
184 immunotherapy in recent years, so we have rich experience in the  
185 identification and management of related adverse reactions. As the principal  
186 investigator, we also conducted a randomized controlled study of the PRO  
187 follow-up system, with excellent results and a mature approach.

188 (3) Feasible conditions: Immunotherapy is currently one of the primary  
189 treatment modalities in our department, and more than 500 immunotherapy  
190 patients are now admitted annually. Hence, it is feasible to obtain study  
191 subjects.

192

### 193 **Features and Innovations**

194

195 Immunotherapy is currently one of the hottest directions in oncology

196 treatment, with an increasingly wide range of applications, and there is growing  
197 concern about how to ensure patient safety. However, domestic and  
198 international studies on patient management have been rarely reported. This  
199 study was conducted to manage patients on such new drugs to facilitate drug  
200 promotion and ensure patient safety and efficacy of drug administration. This  
201 study has more significant clinical implications for the management of patients  
202 on such new drugs in terms of drug promotion, ensuring safe patient access,  
203 and ensuring drug efficacy.

204 Foreign literature confirms that the PRO follow-up system leads to a better  
205 prognosis in oncology patients. However, there is a lack of studies reported in  
206 immunotherapy patients. In a context where domestic follow-up is still lacking,  
207 this study investigates the effectiveness of this new follow-up model, which can  
208 provide a basis for exploring effective follow-up models and has value for  
209 replication.

210 The present study is innovative, practical and generalized from theoretical  
211 and technical aspects.
