# Supplementary material for: Efficiency of Electronic Health Record Assessment of Patient-Reported Outcomes After Cancer Immunotherapy: A Randomized Clinical Trial
Source: PubMed Central journal article supplement (PMC8972037; doi:10.1001/jamanetworkopen.2022.4427), 2022-03-31
Supplement: jamanetwopen-e224427-s003.pdf [file jamanetwopen-e224427-s003.pdf]

## Data Sharing Statement

Zhang. Efficiency of Electronic Health Record Assessment of Patient-Reported Outcomes After Cancer Immunotherapy. *JAMA Netw Open*. Published March 31, 2022.

doi:10.1001/jamanetworkopen.2022.4427

### Data

**Data available:** No

### Additional Information

**Explanation for why data not available:** The datasets used and /or analyzed during the current study are available from the corresponding author on reasonable request.
